# Supplementary material for: In situ preparation of silver nanoparticles on biocompatible methacrylated poly(vinyl alcohol) and cellulose based polymeric nanofibers
Source: Royal Society of Chemistry journal article supplement (doi:10.1039/c2ra20637d), 2012-01-01

# **In situ Preparation of Silver Nanoparticles on Biocompatible Methacrylated Poly (vinyl alcohol) and Cellulose Based Polymeric Nanofibers**

*Narahari Mahanta, Suresh Valiyaveetil\**

<sup>1</sup>Department of Chemistry, National University of Singapore, 3 Science Drive 3, Singapore  
117543

E-mail: [chmsv@nus.edu.sg](mailto:chmsv@nus.edu.sg)

## **Table of Contents**

**SI 1:** NMR spectra of PVA, dextran and methyl cellulose and their corresponding methacrylated derivatives

**SI 2:** Thermo gravimetric analysis of PVA, dextran, methyl cellulose nanofiber and with the presence of Ag-nanoparticles.

**SI 3:** Photograph images showing the antimicrobial activity against *E. coli* growth with PVA-Ag nanofibers.

**SI 1:** NMR spectra of PVA, dextran and methyl cellulose and their corresponding methacrylated derivatives.

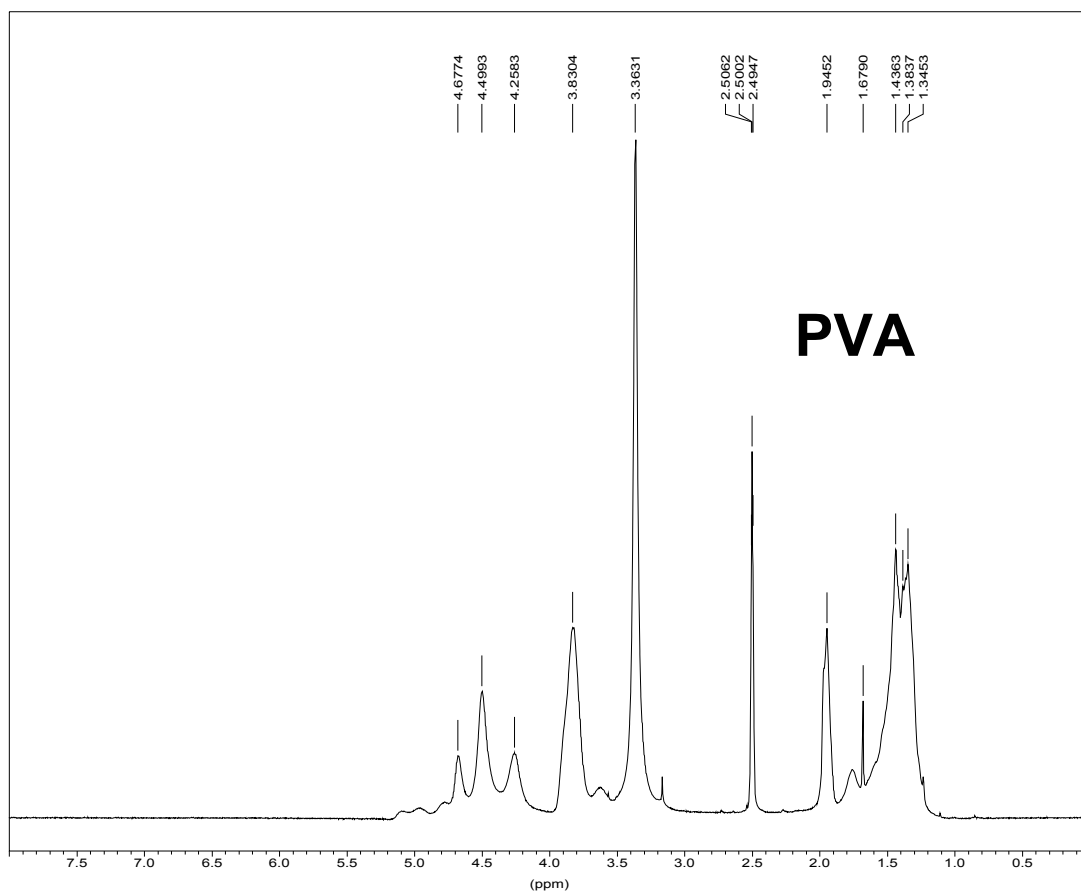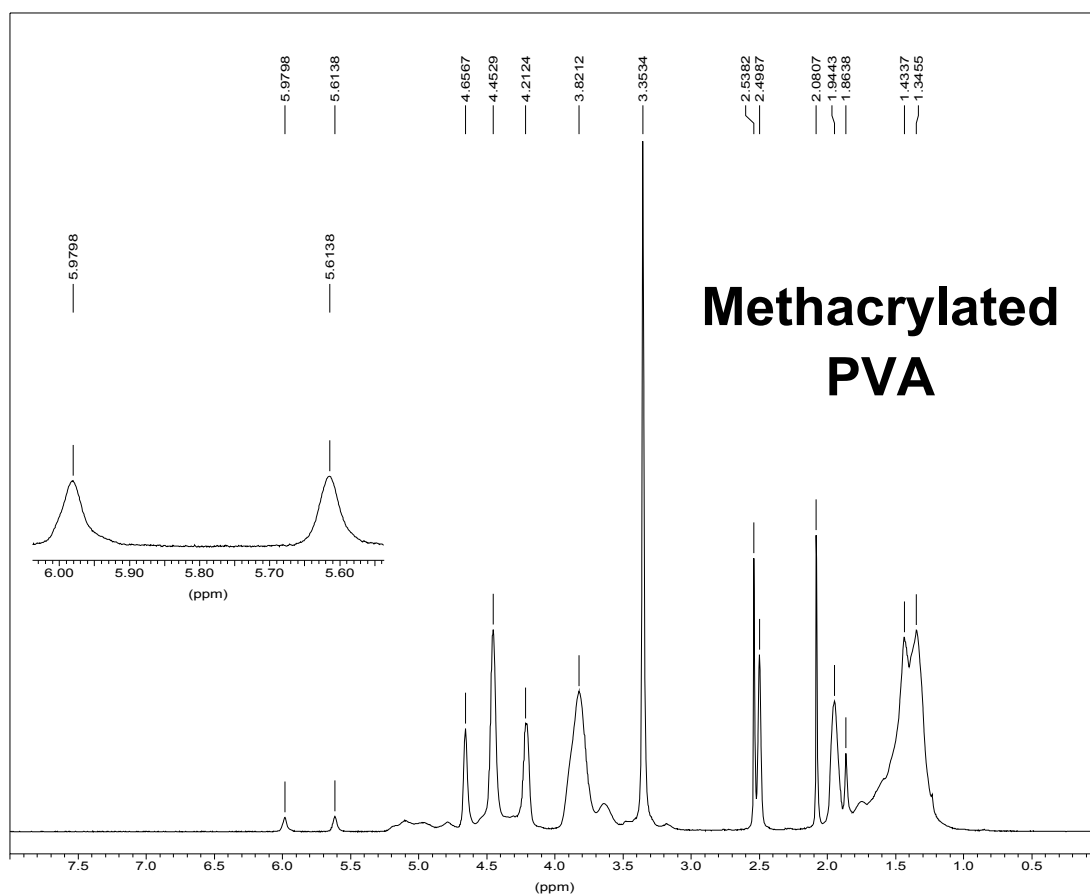

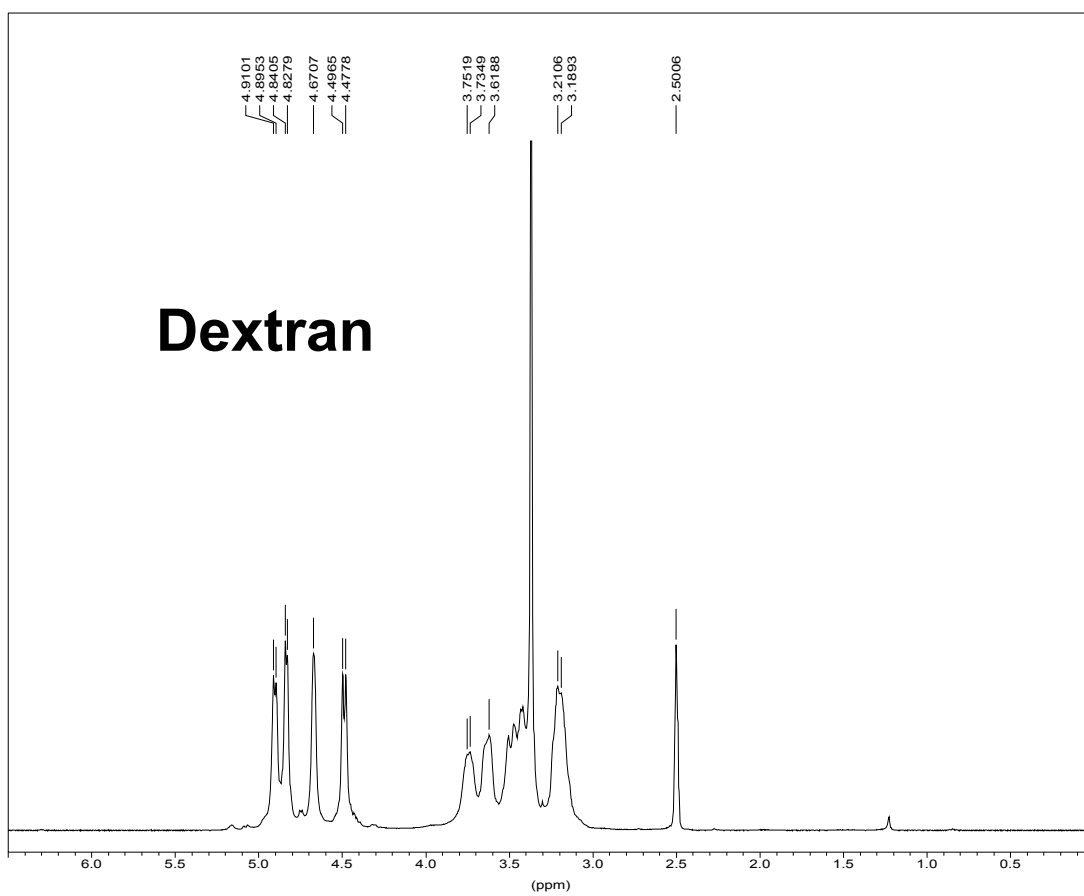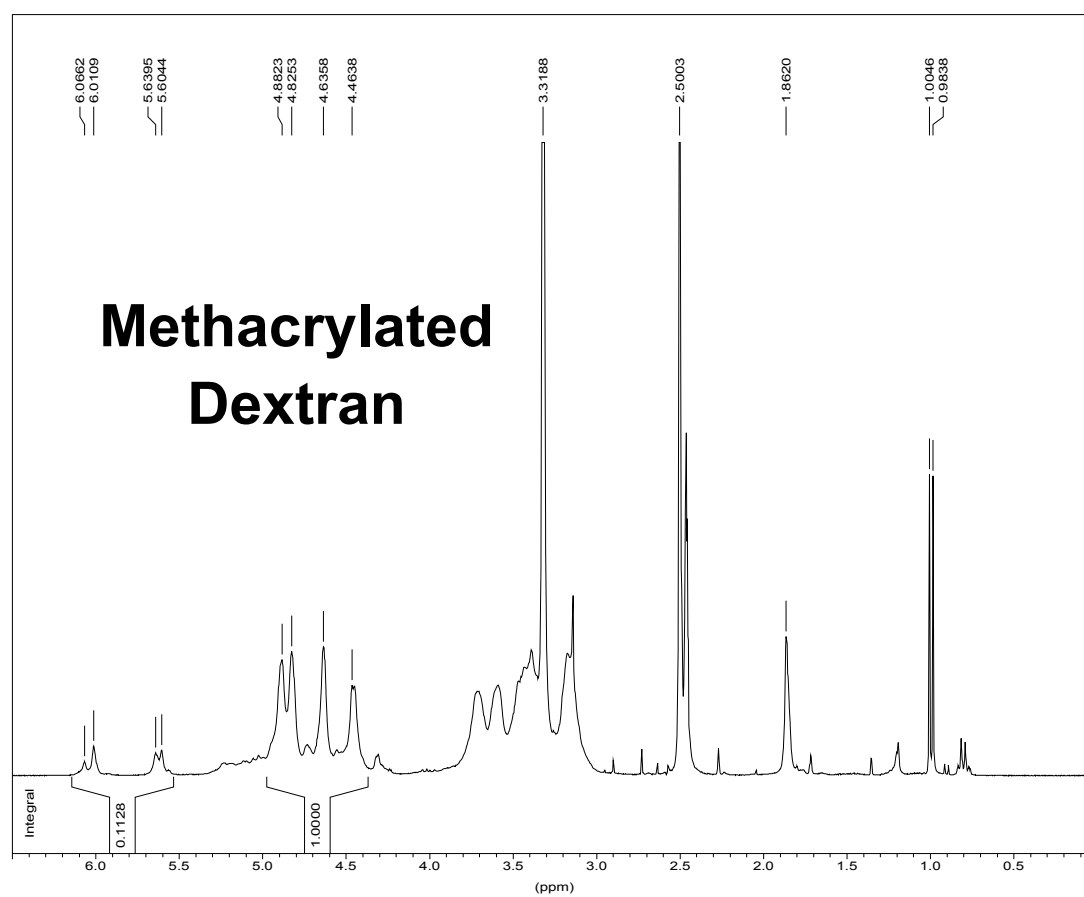

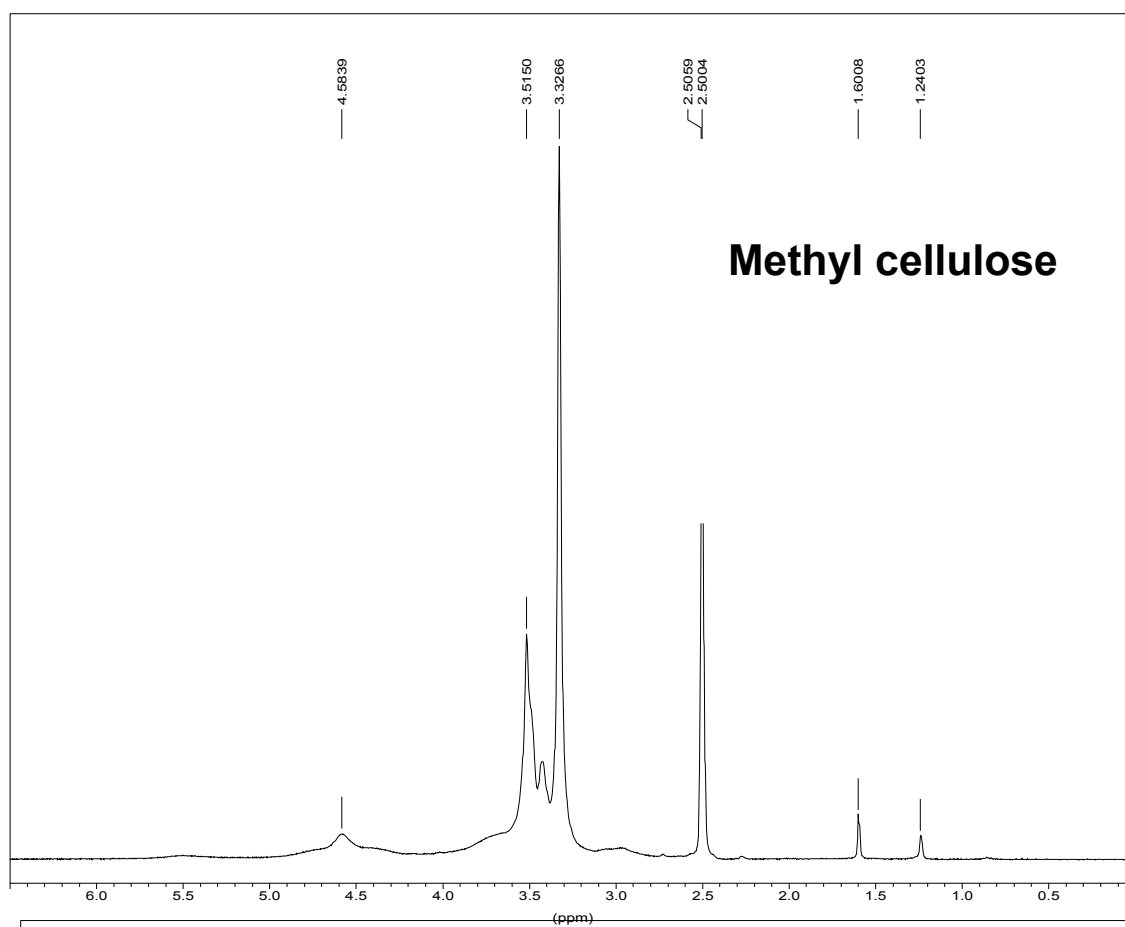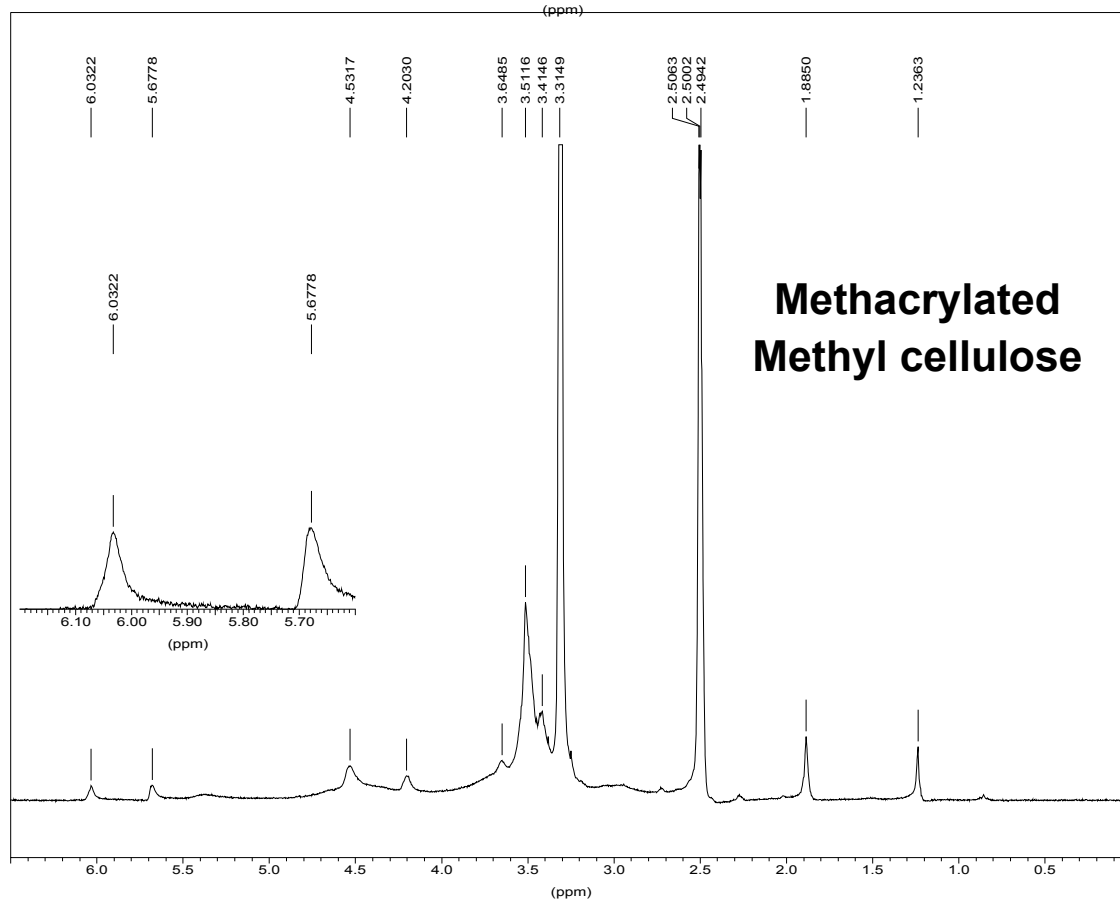

**SI 2:** Thermo gravimetric analysis of PVA, dextran, methyl cellulose nanofiber and with the presence of Ag-nanoparticles.

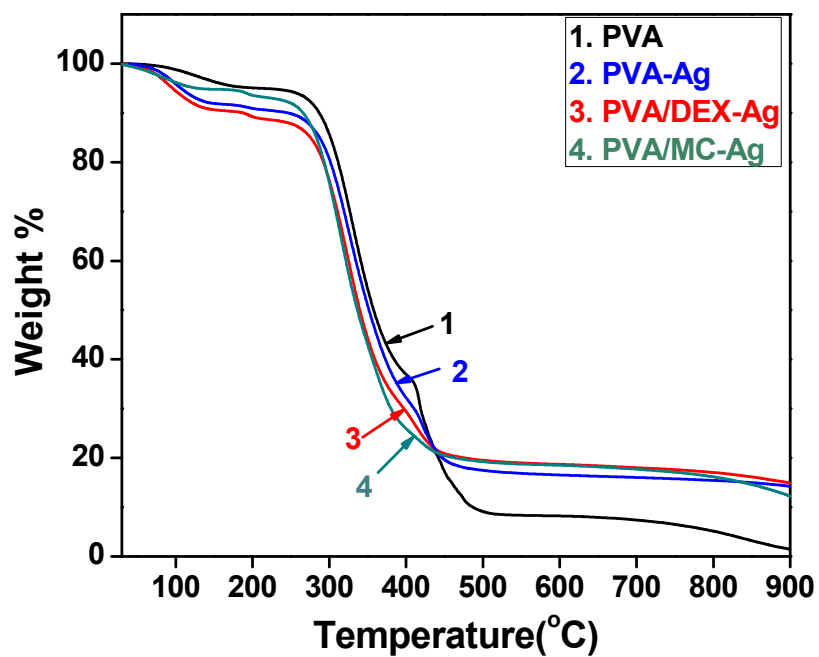

**SI 3:** Photograph images showing the antimicrobial activity against *E. coli* growth with PVA-Ag nanofibers.

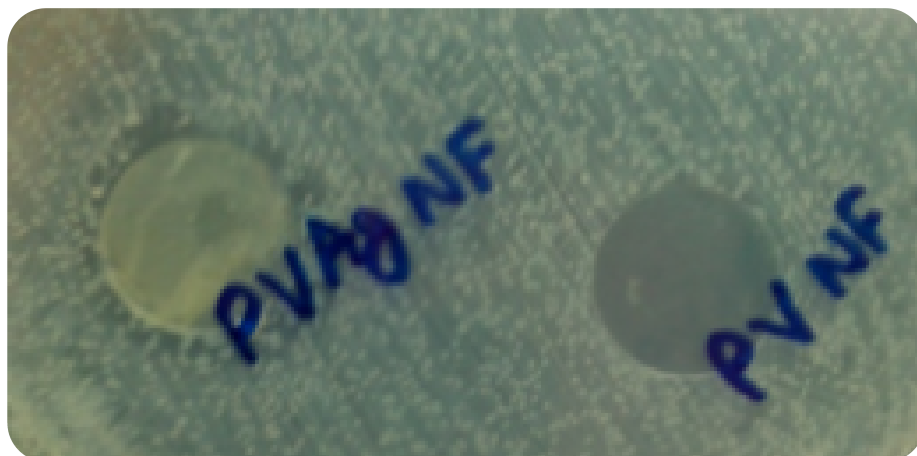

Supplement: c2ra20637d.pdf [file c2ra20637d.pdf]
